# Supplementary material for: Mayaro Virus Infection in Amazonia: A Multimodel Inference Approach to Risk Factor Assessment
Source: PLoS Negl Trop Dis. 2012 Oct 11;6(10):e1846. doi: 10.1371/journal.pntd.0001846 (PMC3469468; doi:10.1371/journal.pntd.0001846)
Supplement: Table S1 — The complete set of 128 models; covariates, AICc and related metrics, and number of parameters are given for each model. (XLS) [file pntd.0001846.s001.xls]

## Sheet: Plan1
Model	AICc	ΔAIC	Likelihood	wi	k
Area+Crop+Bednet	238.923	0	1	0.0702376	6
Area+Crop+Bednet+Latrine	239.028	0.104333	0.949171	0.0666675	7
Area+Crop+Bednet+Pig+Latrine	239.158	0.235127	0.889084	0.0624471	8
Area+Crop+Bednet+Pig	239.323	0.399758	0.81883	0.0575126	7
Area+Bednet	239.547	0.62336	0.732216	0.0514291	5
Area+Crop+Bednet+Pig+Latrine+Waste	239.708	0.785103	0.675331	0.0474337	9
Area+Pig+Bednet	239.797	0.87364	0.646088	0.0453797	6
Area+Pig+Bednet+Latrine	239.846	0.923093	0.630308	0.0442713	7
Area+Bednet+Latrine	239.882	0.958626	0.619209	0.0434917	6
Area+Crop+Bednet+Pig+Waste	240.051	1.12734	0.569118	0.0399735	8
Area+Crop+Bednet+Dog+Latrine	240.21	1.28631	0.525633	0.0369192	8
Area+Crop+Bednet+Dog	240.243	1.31988	0.516883	0.0363046	7
Area+Crop+Bednet+Waste	240.257	1.33381	0.513295	0.0360526	7
Area+Crop+Bednet+Latrine+Waste	240.296	1.3732	0.503284	0.0353495	8
Area+Crop+Bednet+Dog+Pig+Latrine	240.754	1.83027	0.400462	0.0281275	9
Area+Crop+Bednet+Pig+Dog	240.986	2.06227	0.356603	0.0250469	8
Area+Pig+Bednet+Latrine+Waste	240.994	2.07051	0.355136	0.0249439	8
Area+Pig+Bednet+Waste	241.065	2.14206	0.342656	0.0240673	7
Full	241.19	2.2665	0.321985	0.0226154	10
Area+Bednet+Waste	241.264	2.34076	0.310249	0.0217911	6
Area+Crop+Bednet+Dog+Latrine+Waste	241.282	2.35907	0.307422	0.0215926	9
Area+Crop+Bednet+Dog+Waste	241.435	2.51191	0.284804	0.0200039	8
Area+Dog+Bednet	241.56	2.63664	0.267584	0.0187944	6
Area+Bednet+Latrine+Waste	241.569	2.64559	0.266389	0.0187105	7
Area+Crop+Bednet+Pig+Dog+Waste	241.642	2.71871	0.256827	0.0180389	8
Area+Dog+Bednet+Latrine	241.882	2.95845	0.227814	0.0160011	7
Area+Dog+Pig+Bednet	241.884	2.96064	0.227565	0.0159836	7
Area+Dog+Pig+Bednet+Latrine	241.944	3.02068	0.220835	0.0155109	8
Area+Dog+Pig+Bednet+Latrine+Waste	243.1	4.17657	0.1239	0.00870242	9
Area+Dog+Pig+Bednet+Waste	243.165	4.24213	0.119904	0.00842176	8
Area+Dog+Bednet+Waste	243.275	4.35187	0.113502	0.00797211	7
Area+Dog+Bednet+Latrine+Waste	243.555	4.63211	0.0986621	0.00692979	8
Area+Crop	249.162	10.2392	0.0059785	0.000419915	5
Area+Crop+Latrine	249.167	10.2432	0.00596636	0.000419063	6
Area+Crop+Waste	250.008	11.0849	0.00391686	0.000275111	6
Area+Crop+Latrine+Waste	250.056	11.1327	0.00382443	0.000268619	7
Area+Crop+Pig+Latrine	250.098	11.1745	0.00374527	0.000263059	7
Area+Crop+Pig+Latrine+Waste	250.38	11.4571	0.00325184	0.000228401	8
Area+Crop+Pig	250.417	11.4936	0.00319299	0.000224268	6
Area+Crop+Pig+Waste	250.755	11.8317	0.0026963	0.000189382	7
Area+Crop+Dog	251.207	12.284	0.00215058	0.000151052	6
Area+Crop+Dog+Latrine	251.258	12.3347	0.00209682	0.000147276	7
Area+Crop+Dog+Waste	252.096	13.1731	0.00137877	9.68416e-05	7
Area+Crop+Dog+Pig+Latrine	252.13	13.2062	0.00135614	9.52517e-05	8
Area+Crop+Dog+Latrine+Waste	252.155	13.2317	0.00133894	9.40442e-05	8
Area+Crop+Dog+Pig	252.351	13.4281	0.00121371	8.52482e-05	7
Area+Crop+Dog+Pig+Latrine+Waste	252.465	13.5413	0.00114695	8.0559e-05	9
Area+Crop+Dog+Pig+Waste	252.753	13.8296	0.000992957	6.97429e-05	8
Area	254.846	15.9227	0.000348677	2.44903e-05	4
Area+Latrine	255.469	16.5456	0.00025537	1.79366e-05	5
Area+Dog	255.472	16.549	0.000254938	1.79062e-05	5
Area+Pig	256.284	17.3603	0.000169925	1.19352e-05	5
Area+Dog+Latrine	256.297	17.3734	0.000168815	1.18572e-05	6
Aarea+Waste	256.379	17.4552	0.000162049	1.13819e-05	5
Area+Dog+Pig	256.395	17.4713	0.000160749	1.12906e-05	6
Area+Pig+Latrine	256.64	17.7168	0.000142184	9.98666e-06	6
Area+Dog+Pig+Latrine	256.914	17.9908	0.000123979	8.70797e-06	7
Area+Latrine+Waste	257.055	18.1313	0.00011557	8.11734e-06	6
Area+Dog+Waste	257.127	18.2041	0.000111435	7.82694e-06	6
Area+Pig+Waste	257.558	18.635	8.98394e-05	6.31011e-06	6
Area+Dog+Pig+Waste	257.725	18.802	8.26416e-05	5.80455e-06	7
Area+Pig+Latrine+Waste	257.92	18.9963	7.49904e-05	5.26714e-06	7
Area+Dog+Latrine+Waste	258.003	19.0794	7.19397e-05	5.05287e-06	7
Area+Dog+Pig+Latrine+Waste	258.265	19.3414	6.3107e-05	4.43248e-06	8
Dog+Pig+Bednet+Latrine+Waste	318.362	79.439	5.62393e-18	3.95012e-19	6
Dog+Pig+Bednet+Latrine	319.548	80.6251	3.10805e-18	2.18302e-19	5
Crop+Dog+Pig+Bednet+Latrine+Waste	319.951	81.0275	2.5416e-18	1.78516e-19	7
Crop+Dog+Pig+Bednet+Latrine	321.467	82.5439	1.19077e-18	8.36368e-20	6
Crop+Dog+Pig+Latrine+Waste	321.467	82.5439	1.19077e-18	8.36368e-20	6
Dog+Pig+Bednet+Waste	321.824	82.9003	9.96413e-19	6.99857e-20	5
Dog+Pig+Bednet	323.029	84.1054	5.45433e-19	3.83099e-20	4
Crop+Dog+Pig+Bednet+Waste	323.63	84.7071	4.03719e-19	2.83563e-20	6
Crop+Dog+Pig+Bednet	325.058	86.135	1.97711e-19	1.38867e-20	5
Pig+Bednet+Latrine+Waste	330.842	91.9191	1.09651e-20	7.70163e-22	5
Pig+Bednet+Latrine	331.868	92.9444	6.56727e-21	4.6127e-22	4
Crop+Pig+Bednet+Latrine+Waste	332.714	93.7908	4.30125e-21	3.0211e-22	6
Crop+Pig+Bednet+Latrine	333.433	94.5101	3.00188e-21	2.10845e-22	5
Bednet+Pig+Waste	335.229	96.3062	1.22286e-21	8.5891e-23	4
Pig+Bednet	336.489	97.566	6.51344e-22	4.57488e-23	3
Crop+Pig+Bednet+Waste	336.674	97.7511	5.93782e-22	4.17058e-23	5
Crop+Pig+Bednet	337.417	98.4937	4.09603e-22	2.87695e-23	4
Dog+Bednet+Latrine	337.702	98.7788	3.55193e-22	2.49479e-23	4
Dog+Bednet+Latrine+Waste	338.885	99.9617	1.96601e-22	1.38088e-23	5
Crop+Dog+Bednet+Latrine	339.565	100.642	1.39908e-22	9.8268e-24	5
Dog+Bednet	340.004	101.081	1.12367e-22	7.89236e-24	3
Crop+Dog+Bednet+Latrine+Waste	340.578	101.655	8.43219e-23	5.92257e-24	6
Bednet+Dog+Waste	341.136	102.213	6.37827e-23	4.47994e-24	4
Dog+Pig+Latrine+Waste	341.356	102.433	5.71428e-23	4.01357e-24	5
Dog+Pig+Latrine	341.957	103.034	4.2321e-23	2.97253e-24	4
Crop+Dog+Bednet	342.003	103.079	4.13622e-23	2.90518e-24	4
Crop+Dog+Pig+Latrine	342.172	103.249	3.80057e-23	2.66943e-24	5
Crop+Dog+Bednet+Waste	343.033	104.11	2.47106e-23	1.73561e-24	5
Latrine+Pig+Waste	343.32	104.397	2.14073e-23	1.50359e-24	4
Pig+Latrine	343.94	105.016	1.57023e-23	1.10289e-24	3
Crop+Pig+Latrine+Waste	344.867	105.944	9.87469e-24	6.93575e-25	5
Pig+Dog+Waste	345.541	106.618	7.05077e-24	4.95229e-25	4
Crop+Dog+Pig+Waste	345.768	106.845	6.29514e-24	4.42156e-25	5
Crop+Pig+Latrine	345.793	106.87	6.21556e-24	4.36566e-25	4
Dog+Pig	346.378	107.455	4.63873e-24	3.25813e-25	3
Pig+Waste	347.851	108.928	2.22103e-24	1.56e-25	3
Pig	348.738	109.815	1.42541e-24	1.00117e-25	2
Crop+Pig+Waste	349.783	110.86	8.45328e-25	5.93738e-26	4
Crop+Pig	350.778	111.855	5.13993e-25	3.61016e-26	3
Dog+Latrine	358.131	119.208	1.30111e-26	9.13869e-28	3
Crop+Dog+Latrine	358.563	119.64	1.04853e-26	7.36464e-28	4
Crop+Dog+Latrine+Waste	359.122	120.199	7.92756e-27	5.56813e-28	5
Latrine+Dog+Waste	359.208	120.285	7.59437e-27	5.3341e-28	4
Dog	360.79	121.866	3.44389e-27	2.41891e-28	2
Crop+Dog+Pig	361.625	122.702	2.26758e-27	1.59269e-28	4
Dog+Waste	361.661	122.737	2.22808e-27	1.56495e-28	3
Crop+Dog	361.846	122.923	2.03069e-27	1.42631e-28	3
Crop+Dog+Waste	362.273	123.35	1.64013e-27	1.15198e-28	4
Bednet+Latrine	363.793	124.87	7.67183e-28	5.38851e-29	3
Crop+Bednet+Latrine	364.238	125.315	6.1404e-28	4.31287e-29	4
Bednet+Latrine+Waste	365.386	126.462	3.45963e-28	2.42996e-29	4
Crop+Bednet+Latrine+Waste	366.044	127.12	2.48976e-28	1.74875e-29	5
Crop+Bednet	366.372	127.448	2.11316e-28	1.48423e-29	3
Bednet	366.746	127.823	1.75246e-28	1.23088e-29	2
Crop+Bednet+Waste	368.118	129.195	8.82344e-29	6.19737e-30	4
Bednet+Waste	368.19	129.267	8.51343e-29	5.97963e-30	3
Latrine	369.632	130.709	4.14003e-29	2.90786e-30	2
Latrine+Waste	371.047	132.124	2.04018e-29	1.43297e-30	3
Crop+Latrine	371.524	132.601	1.60723e-29	1.12888e-30	3
Null	372.513	133.59	9.80359e-30	6.8858e-31	1
Crop+Latrine+Waste	373.022	134.099	7.60049e-30	5.3384e-31	4
Waste	373.749	134.826	5.28334e-30	3.71089e-31	2
Crop	374.101	135.177	4.43217e-30	3.11305e-31	2
Crop+Waste	375.488	136.565	2.21445e-30	1.55537e-31	3
