# Supplementary material for: Mayaro Virus Infection in Amazonia: A Multimodel Inference Approach to Risk Factor Assessment
Source: PLoS Negl Trop Dis. 2012 Oct 11;6(10):e1846. doi: 10.1371/journal.pntd.0001846 (PMC3469468; doi:10.1371/journal.pntd.0001846)
Supplement: Text S1 — STROBE statement. (PDF) [file pntd.0001846.s002.pdf]

STROBE Statement—Checklist of items that should be included in reports of *cross-sectional studies*

|                           | Item No | Recommendation                                                                                                                                                                                                                                                                                                                                                      |
|---------------------------|---------|---------------------------------------------------------------------------------------------------------------------------------------------------------------------------------------------------------------------------------------------------------------------------------------------------------------------------------------------------------------------|
| <b>Title and abstract</b> | 1       | (a) Indicate the study's design with a commonly used term in the title or the abstract (OK)<br>(b) Provide in the abstract an informative and balanced summary of what was done and what was found (OK)                                                                                                                                                             |
| <b>Introduction</b>       |         |                                                                                                                                                                                                                                                                                                                                                                     |
| Background/rationale      | 2       | Explain the scientific background and rationale for the investigation being reported (OK)                                                                                                                                                                                                                                                                           |
| Objectives                | 3       | State specific objectives, including any prespecified hypotheses (OK)                                                                                                                                                                                                                                                                                               |
| <b>Methods</b>            |         |                                                                                                                                                                                                                                                                                                                                                                     |
| Study design              | 4       | Present key elements of study design early in the paper (OK)                                                                                                                                                                                                                                                                                                        |
| Setting                   | 5       | Describe the setting (OK), locations (OK), and relevant dates, including periods of recruitment, exposure, follow-up (NA), and data collection (OK)                                                                                                                                                                                                                 |
| Participants              | 6       | Give the eligibility criteria, and the sources and methods of selection of participants (OK)                                                                                                                                                                                                                                                                        |
| Variables                 | 7       | Clearly define all outcomes, exposures, predictors, potential confounders, and effect modifiers (OK). Give diagnostic criteria, if applicable (OK)                                                                                                                                                                                                                  |
| Data sources/measurement  | 8       | For each variable of interest, give sources of data and details of methods of assessment (measurement) (OK). Describe comparability of assessment methods if there is more than one group (NA)                                                                                                                                                                      |
| Bias                      | 9       | Describe any efforts to address potential sources of bias (OK)                                                                                                                                                                                                                                                                                                      |
| Study size                | 10      | Explain how the study size was arrived at (OK)                                                                                                                                                                                                                                                                                                                      |
| Quantitative variables    | 11      | Explain how quantitative variables were handled in the analyses. If applicable, describe which groupings were chosen and why (OK)                                                                                                                                                                                                                                   |
| Statistical methods       | 12      | (a) Describe all statistical methods, including those used to control for confounding (OK)<br>(b) Describe any methods used to examine subgroups and interactions (OK)<br>(c) Explain how missing data were addressed (NA)<br>(d) If applicable, describe analytical methods taking account of sampling strategy (OK)<br>(e) Describe any sensitivity analyses (OK) |
| <b>Results</b>            |         |                                                                                                                                                                                                                                                                                                                                                                     |
| Participants              | 13      | (a) Report numbers of individuals at each stage of study—eg numbers potentially eligible (OK), examined for eligibility, confirmed eligible, included in the study (OK), completing follow-up, and analysed (OK)<br>(b) Give reasons for non-participation at each stage (NA)<br>(c) Consider use of a flow diagram (NA)                                            |
| Descriptive data          | 14      | (a) Give characteristics of study participants (eg demographic, clinical, social) and information on exposures and potential confounders (OK)<br>(b) Indicate number of participants with missing data for each variable of interest (NA)                                                                                                                           |
| Outcome data              | 15      | Report numbers of outcome events or summary measures (OK)                                                                                                                                                                                                                                                                                                           |
| Main results              | 16      | (a) Give unadjusted estimates and, if applicable, confounder-adjusted estimates and their precision (eg, 95% confidence interval). Make clear which confounders were adjusted for and why they were included (OK)                                                                                                                                                   |

|                          |    |                                                                                                                                                                                 |
|--------------------------|----|---------------------------------------------------------------------------------------------------------------------------------------------------------------------------------|
|                          |    | (b) Report category boundaries when continuous variables were categorized (OK)                                                                                                  |
|                          |    | (c) If relevant, consider translating estimates of relative risk into absolute risk for a meaningful time period (NA)                                                           |
| Other analyses           | 17 | Report other analyses done—eg analyses of subgroups and interactions, and sensitivity analyses (OK)                                                                             |
| <b>Discussion</b>        |    |                                                                                                                                                                                 |
| Key results              | 18 | Summarise key results with reference to study objectives (OK)                                                                                                                   |
| Limitations              | 19 | Discuss limitations of the study, taking into account sources of potential bias or imprecision. Discuss both direction and magnitude of any potential bias (OK)                 |
| Interpretation           | 20 | Give a cautious overall interpretation of results considering objectives, limitations, multiplicity of analyses, results from similar studies, and other relevant evidence (OK) |
| Generalisability         | 21 | Discuss the generalisability (external validity) of the study results (OK)                                                                                                      |
| <b>Other information</b> |    |                                                                                                                                                                                 |
| Funding                  | 22 | Give the source of funding and the role of the funders for the present study (OK) and, if applicable, for the original study on which the present article is based              |
